# Supplementary material for: Functional and Molecular Analysis of Human Osteoarthritic Chondrocytes Treated with Bone Marrow-Derived MSC-EVs
Source: MDPI journal article supplement (doi:10.3390/bioengineering11040388), 2024-04-17
Supplement: s1 [file s1]

**Table S1.** TaqMan Gene and MicroRNA Assay IDs. All Assays were supplied by ThermoFisher Scientific.

| <b>Gene/MicroRNA</b> | <b>Assay ID</b> |
|----------------------|-----------------|
| MMP13                | Hs00942584_m1   |
| SOX9                 | Hs00165814_m1   |
| ACAN                 | Hs00153936_m1   |
| COL2A1               | Hs00264051_m1   |
| COL10A1              | Hs00166657_m1   |
| ADAMTS5              | Hs01095518_m1   |
| GAPDH                | Hs02786624_g1   |
| miR-145-5p           | 002278          |
| miR-29b-3p           | 000413          |
| miR-21-5p            | 000397          |
| U6                   | 001973          |
| HY3                  | 001214          |
